# Supplementary material for: Electrocatalytic nitrate reduction over Cu 2 O nanowires partially decorated with Fe 2 O 3 nanoparticles
Source: Royal Society of Chemistry journal article supplement (doi:10.1039/d5cc06862b), 2026-01-01
Supplement: d5cc06862b1.pdf [file d5cc06862b1.pdf]

## Supplementary Information

### Electrocatalytic Nitrate Reduction over Cu<sub>2</sub>O Nanowires Partially Decorated with Fe<sub>2</sub>O<sub>3</sub>

#### Nanoparticles

Kaili Liu,<sup>†a</sup> Zhehao Sun,<sup>†a</sup> Muhammad Usman,<sup>a</sup> Jiayi Chen,<sup>a</sup> Myat Naing,<sup>a</sup> Huiming Gu,<sup>a</sup> Yi-lun Chen,<sup>a</sup> Yiding Yang,<sup>a</sup> Hang Yin,<sup>a</sup> Ary Anggara Wibowo,<sup>b</sup> Xuechen Jing,<sup>a</sup> Nicholas Cox<sup>a</sup> and Zongyou Yin<sup>\*a</sup>

#### 1.1 Experimental method

The fabrication of Cu(OH)<sub>2</sub> nanowires on Cu foam: In general, 1 × 3 cm<sup>2</sup> Cu foam was first washed with the mixture of acetone, ethanol and water, subsequently soak the Cu foam in 0.1 M HCl to clean the surface oxide and put it in the vacuum oven under 60°C for 6h to dry it. Then the cleaned Cu foil was soaked in the solution which contains 0.1 M (NH<sub>4</sub>)<sub>2</sub>S<sub>2</sub>O<sub>8</sub> and 1 M NaOH for 30 minutes to form Cu(OH)<sub>2</sub> nanowires on Cu foil (Cu(OH)<sub>2</sub> NW).

The fabrication of xFe<sub>2</sub>O<sub>3</sub>/Cu<sub>2</sub>O: The as-prepared Cu(OH)<sub>2</sub> NF was immersed in 1mM FeCl<sub>2</sub> solution for 1h and washed with water, and then put it in the oven under 60°C for 6h to dry it. Finally, the as-prepared sample was reduced under -0.4V vs. RHE for 1h to obtain 0.01Fe<sub>2</sub>O<sub>3</sub>/Cu<sub>2</sub>O. The content of Fe<sub>2</sub>O<sub>3</sub> can be tuned by changing the concentrations of FeCl<sub>2</sub> solution to 0.05M, 2mM and 3mM for fabricate 0.067Fe<sub>2</sub>O<sub>3</sub>/Cu<sub>2</sub>O 0.2Fe<sub>2</sub>O<sub>3</sub>/Cu<sub>2</sub>O 0.3Fe<sub>2</sub>O<sub>3</sub>/Cu<sub>2</sub>O, respectively. While the pure Cu<sub>2</sub>O sample was synthesized by reducing the Cu(OH)<sub>2</sub> nanowires on Cu foam under -0.4V vs. RHE for 1h.

#### 1.2 Materials characterization

X-ray diffraction (XRD, Bruker Xray diffractometer) using a Cu Kα radiation source was employed to determine the phase composition of the catalysts. The morphology,

composition, and elemental distribution of the catalysts were characterized using scanning electron microscopy (SEM, Zeiss UltraPlus Field emission scanning electron microscope) and transmission electron microscopy (TEM, JEOL 2100F FEGTEM). The surface elemental composition and oxidation states were analyzed by X-ray photoelectron spectroscopy (XPS, Kratos AXIS Supra photoelectron spectrometer using monochromated Al K $\alpha$  radiation, power 300W, Pass energy 20 eV for wide spectra and 5 eV for high resolution), with C 1s used as a reference for calibration. The metal content in the catalysts was quantified using inductively coupled plasma optical emission spectroscopy (ICP-OES). Ultraviolet-visible (UV-Vis) absorption spectra of the products were recorded using a UV-Vis spectrophotometer (UV-2700). Proton nuclear magnetic resonance ( $^1\text{H}$  NMR) analysis was performed on a Bruker Avance III 400 MHz NMR spectrometer.

### **1.3 Electrochemical measurements**

The electrochemical nitrate reduction reaction ( $\text{NO}_3\text{RR}$ ) was performed using a three-electrode system in an H-cell.  $\text{xFe}_2\text{O}_3/\text{Cu}_2\text{O}$  samples were used as the working electrode. Ag/AgCl and Pt foil were used as the reference and counter electrodes, respectively. Nafion-117 membranes were used to separate the two chambers of the H-cell. During the electrocatalysis tests, each chamber was filled with 40 mL of electrolyte (0.1 M  $\text{K}_2\text{SO}_4$  with 1000 ppm  $\text{KNO}_3$ ). Potentiostatic tests were conducted during  $\text{NO}_3\text{RR}$  at different potentials under ambient conditions after 30 min of purging with Ar (99.999%). After 30 min of electroreduction, the concentration of  $\text{NH}_3$  in the electrolyte was measured using the Indophenol-blue method.

### **1.4 Estimation of ammonia**

The liquid products generated from the electroreduction of  $\text{NO}_3^-$  were qualitatively and quantitatively analyzed using UV-Vis spectrophotometry.

Preparation of Colouring reagents:

Chromogenic reagent (A): 1.0 M NaOH solution containing 5 wt% sodium salicylate and 5 wt% potassium sodium tartrate.

Oxidizing solution (B): 0.05 M sodium hypochlorite (available chlorine 10-15 %) solution.

Catalysing reagent (C): 1 wt% sodium nitroferricyanide solution.

Preparation of  $\text{NH}_4^+$  Standard Calibration Curve:

A volume of 2 mL from the standard solutions was transferred into test tubes, followed by the sequential addition of 2 mL of chromogenic reagent (A), 1 mL of oxidizing agent solution (B), and 0.2 mL of catalysing reagent (C). The mixtures were thoroughly shaken and allowed to stand for 1 hour. The concentration of the resulting indophenol blue was then determined using a UV-Vis spectrophotometer, with a scanning wavelength range of 550–750 nm. The standard curve was constructed by plotting absorbance at 655 nm (Y-axis) against the  $\text{NH}_3$  concentration (X-axis)<sup>1</sup>.

Fig. S8a displays that a set of standard ammonia solutions and their UV-vis absorbance curves were prepared to estimate the amount of ammonia in the samples. The prepared calibration curve exhibited an R-square value of 0.99906 (Fig. S8b), which shows that the model fits the data with good accuracy. To minimize possible interference from  $\text{Fe}^{3+}$ ,  $\text{Cu}^{2+}$ , or  $\text{OH}^-$  ions in the colorimetric determination of  $\text{NH}_4^+$ , all measurements were conducted in neutral electrolyte (0.1 M  $\text{K}_2\text{SO}_4$  + 0.01 M  $\text{KNO}_3$ ) without any organic additives. The indophenol-blue method was cross-validated by isotope-labelling and  $^1\text{H}$  NMR controls, confirming negligible background signal and ensuring the reliability of the colorimetric quantification in this system.

### 1.5 Nitrite quantification

Nitrite in the electrolyte was quantified by the Griess colorimetric assay. The chromogenic reagent was freshly prepared by dissolving 0.2 g N-(1-naphthyl)ethylenediamine dihydrochloride, 4.0 g sulfanilamide, and 10 mL H<sub>3</sub>PO<sub>4</sub> in deionized (DI) water and diluting to 50 mL. For each measurement, 1 mL of post-electrolysis electrolyte was diluted with DI water to 5 mL, after which 0.1 mL of reagent was added. The mixture was thoroughly mixed and allowed to react for 20 min at ambient temperature. Absorbance was recorded at 540 nm on a UV–Vis spectrophotometer with scan range 400–700 nm. Calibration curves were constructed with standard NO<sub>2</sub><sup>-</sup> solutions of defined concentrations. Fig. 9a shows UV–Vis spectra of standard nitrite solutions prepared to quantify nitrite in the samples. The corresponding calibration curve (Fig. 9b) exhibits excellent linearity ( $R^2 = 0.9992$ ), confirming reliable concentration determination.

### 1.6 Calculations of the liquid products yield rate and Faradaic efficiency

The NH<sub>3</sub> yield rate was calculated using the following Reaction:

$$Y = (17 \times C \times V) / t \times A$$

The Faradaic efficiency was calculated using the following Reaction:

$$FE (\%) = (n \times F \times C \times V) / Q \times 100$$

where C is the measured liquid products concentration after nitrate reduction in the electrolyte, V is the volume of the electrolyte in the cathode compartment, t is electroreduction time, A is the geometric area of the working electrode, n is the number of electrons required to form the liquid products, F is the Faraday constant (96,485C/mol), and Q is the total charge transfer during electroreduction process<sup>2</sup>.

### 1.7 $^{15}\text{N}$ Isotope Labelling Experiments

For the isotope labelling experiments,  $\text{K}^{15}\text{NO}_3$  (98.3% enrichment, Sigma Aldrich) was utilized as the nitrogen source to trace the origin of ammonia. Electroreduction of nitrate to ammonia was performed at  $-0.4\text{ V}$  (vs. RHE) for  $0.5\text{ h}$  in  $0.1\text{ M K}_2\text{SO}_4$  solution containing  $1000\text{ ppm }^{15}\text{NO}_3^-$ . After the reaction,  $0.6\text{ mL}$  of the liquid product was collected from the cathodic compartment and acidified with  $0.1\text{ mL}$  of  $3\text{ M H}_2\text{SO}_4$ . Subsequently,  $700\text{ }\mu\text{L}$  of the acidified mixture was transferred into an NMR tube for  $^1\text{H}$  NMR analysis. One-dimensional  $^1\text{H}$  NMR spectra were recorded using a Bruker Avance-400 superconducting Fourier transform NMR spectrometer, with water peaks suppressed via the water pre-saturation method.

### 1.8 DFT calculation

Density Functional Theory (DFT) calculations were carried out using the Vienna Ab initio Simulation Package (VASP).<sup>3, 4</sup> The interaction between core and valence electrons was described using the Projector Augmented Wave (PAW) method,<sup>5</sup> and the exchange–correlation effects were treated with the Perdew–Burke–Ernzerhof (PBE) functional under the generalized gradient approximation (GGA) framework.<sup>6</sup> A plane-wave kinetic energy cutoff of  $400\text{ eV}$  was applied throughout the calculations. The structural optimizations were performed until the total energy and atomic forces converged to within  $10^{-4}\text{ eV}$  and  $10^{-2}\text{ eV/\AA}$ , respectively. To account for dispersion forces, Grimme's DFT-D3 correction was employed.<sup>7</sup> The Brillouin zone was sampled using a  $3 \times 3 \times 1$  Monkhorst-Pack k-point mesh. Electronic structure analyses were conducted using the VASPKIT post-processing toolkit.<sup>8</sup> For surface modeling, supercells comprising 80 atoms for  $\text{Fe}_2\text{O}_3$  and 96 atoms for  $\text{Cu}_2\text{O}$  were constructed, ensuring sufficient spatial separation to minimize periodic image interactions.

during Gibbs free energy computations. A vacuum layer of at least 8 Å was added perpendicular to the slab surface to avoid artificial interlayer coupling.

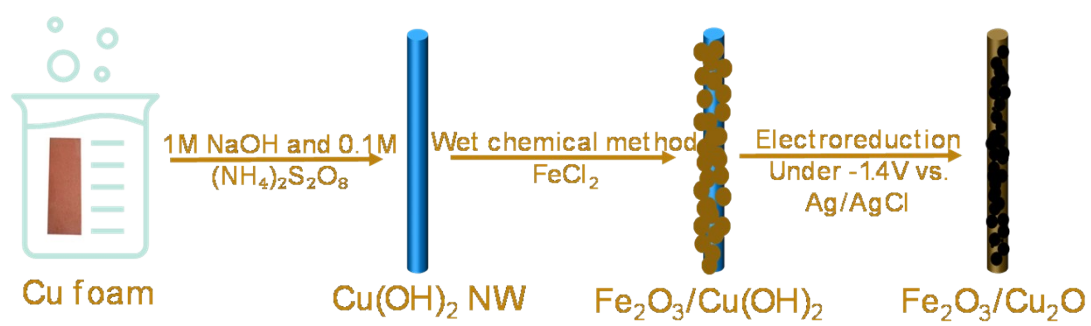

Fig. S1 The schematic process for fabricating Fe<sub>2</sub>O<sub>3</sub>/Cu<sub>2</sub>O.

Table S1. ICP results of Fe and Cu among all samples.

| Precursor               | Cu(%) | Fe(%) | Name as                                                 |
|-------------------------|-------|-------|---------------------------------------------------------|
| 0.5mM FeCl <sub>2</sub> | 93.3  | 6.67  | 0.067 Fe <sub>2</sub> O <sub>3</sub> /Cu <sub>2</sub> O |
| 1mM FeCl <sub>2</sub>   | 89.4  | 10.6  | 0.1 Fe <sub>2</sub> O <sub>3</sub> /Cu <sub>2</sub> O   |
| 2mM FeCl <sub>2</sub>   | 78.5  | 21.5  | 0.2 Fe <sub>2</sub> O <sub>3</sub> /Cu <sub>2</sub> O   |
| 3mM FeCl <sub>2</sub>   | 66.7  | 33.3  | 0.3 Fe <sub>2</sub> O <sub>3</sub> /Cu <sub>2</sub> O   |



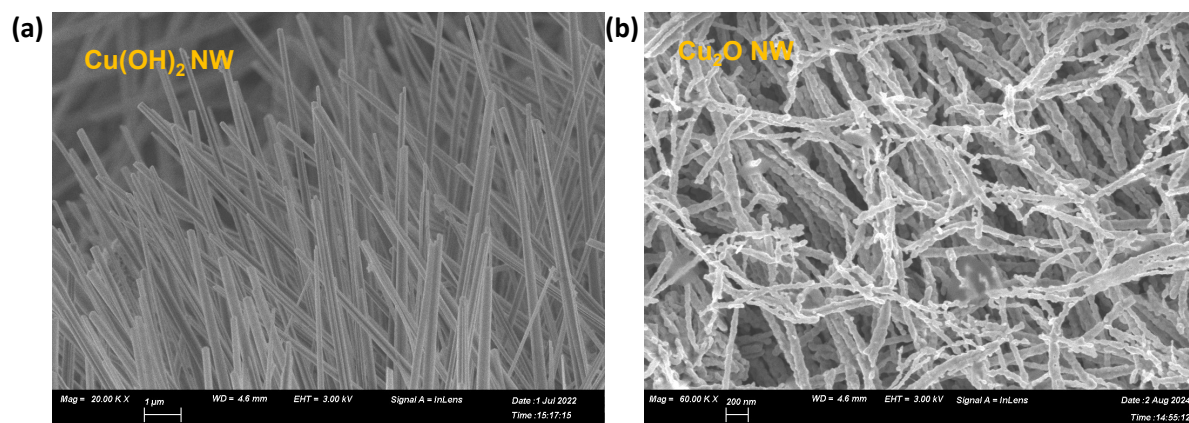

Fig. S2 The SEM images of  $\text{Cu}(\text{OH})_2$  NW (a) and  $\text{Cu}_2\text{O}$  NW (b).

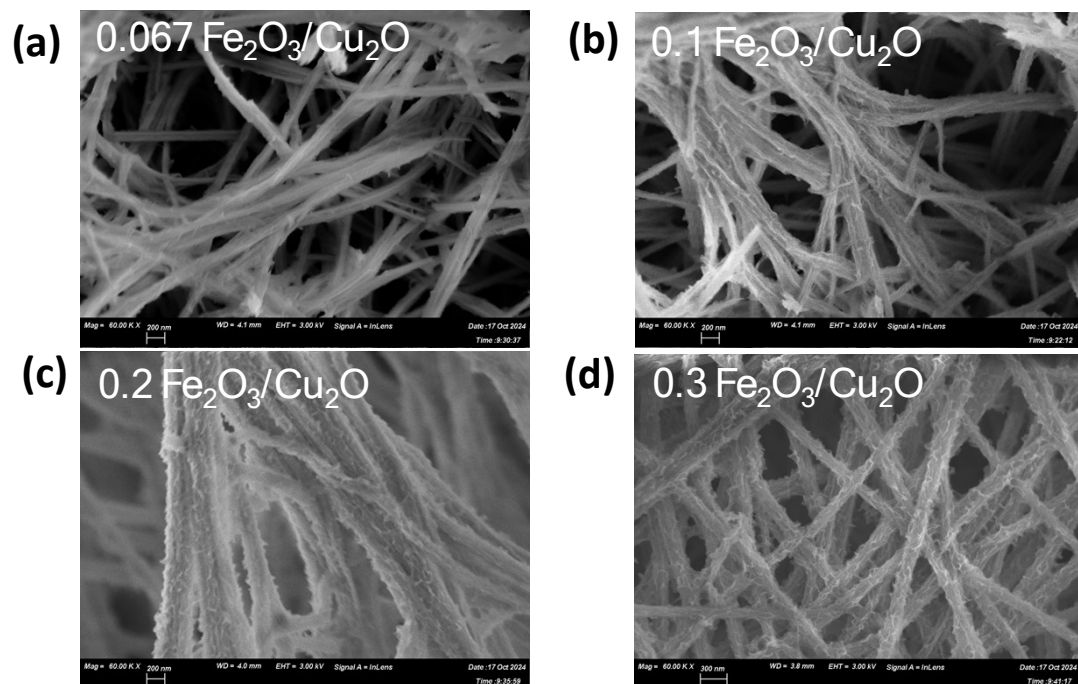

Fig. S3 SEM images of the pre-prepared 0.067  $\text{Fe}_2\text{O}_3/\text{Cu}_2\text{O}$  (a), 0.1  $\text{Fe}_2\text{O}_3/\text{Cu}_2\text{O}$  (b), 0.2  $\text{Fe}_2\text{O}_3/\text{Cu}_2\text{O}$  (c) and 0.3  $\text{Fe}_2\text{O}_3/\text{Cu}_2\text{O}$  (d).

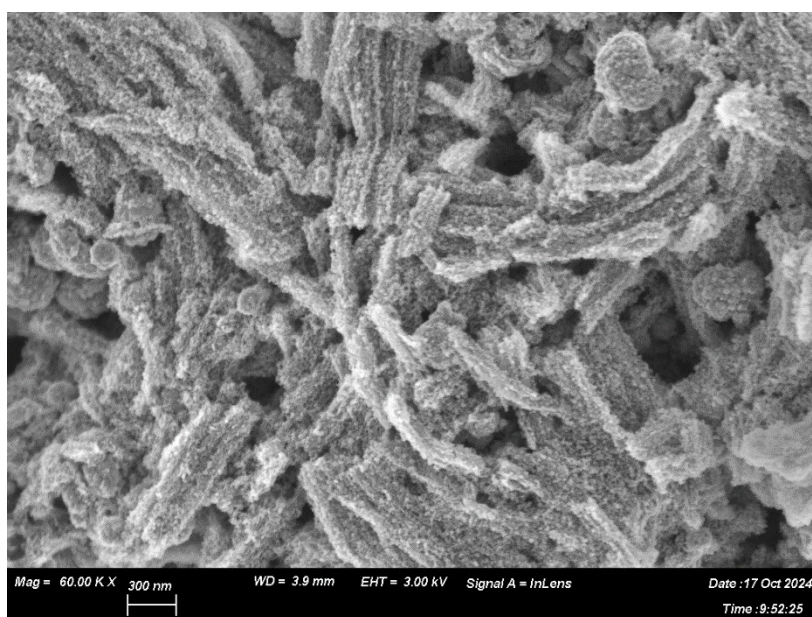

Fig. S4 SEM image of 0.1 Fe<sub>2</sub>O<sub>3</sub>/Cu<sub>2</sub>O after 1h electroreduction under -0.4V Vs. RHE.

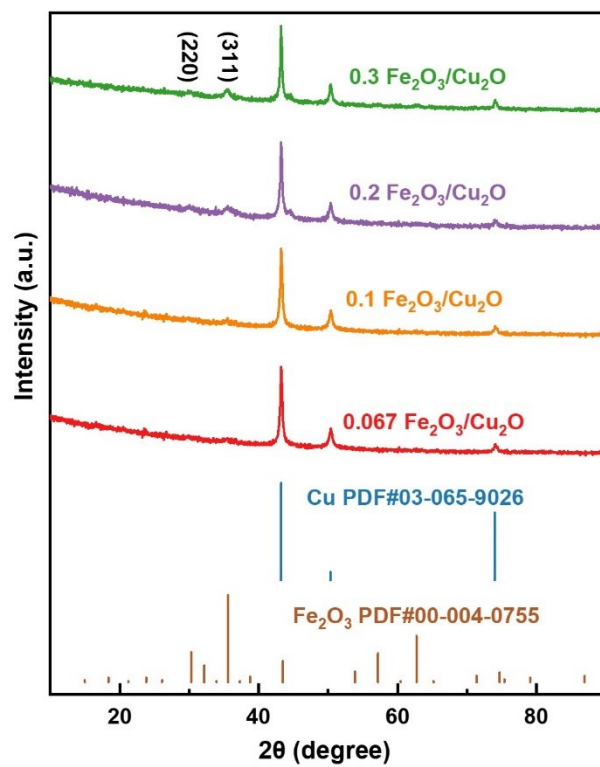

Fig. S5 XRD patterns of 0.067 Fe<sub>2</sub>O<sub>3</sub>/Cu<sub>2</sub>O (a), 0.1 Fe<sub>2</sub>O<sub>3</sub>/Cu<sub>2</sub>O (b), 0.2 Fe<sub>2</sub>O<sub>3</sub>/Cu<sub>2</sub>O (c) and 0.3 Fe<sub>2</sub>O<sub>3</sub>/Cu<sub>2</sub>O (d).

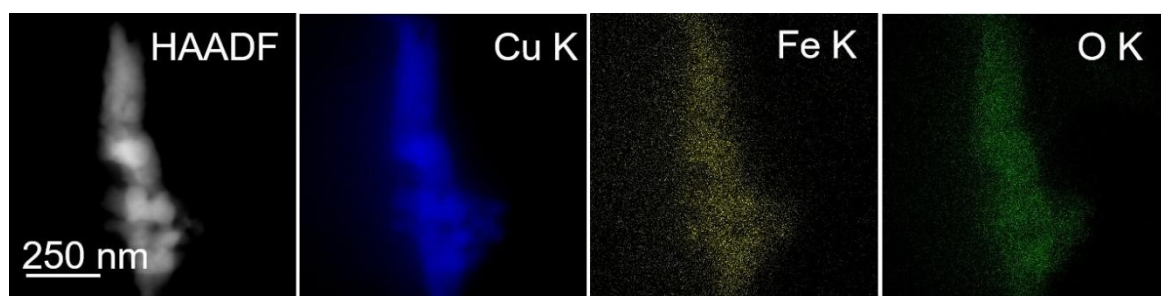

Fig. S6 EDS mapping of 1mM FeCuO<sub>x</sub>.

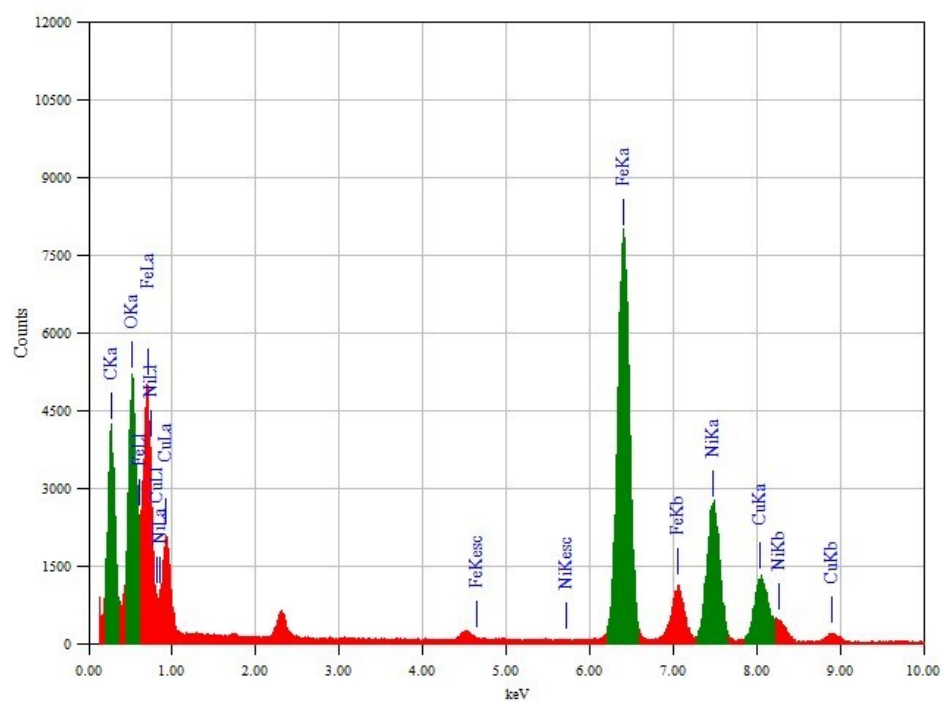

Fig. S7 EDS spectra of 1mM FeCuO<sub>x</sub>.

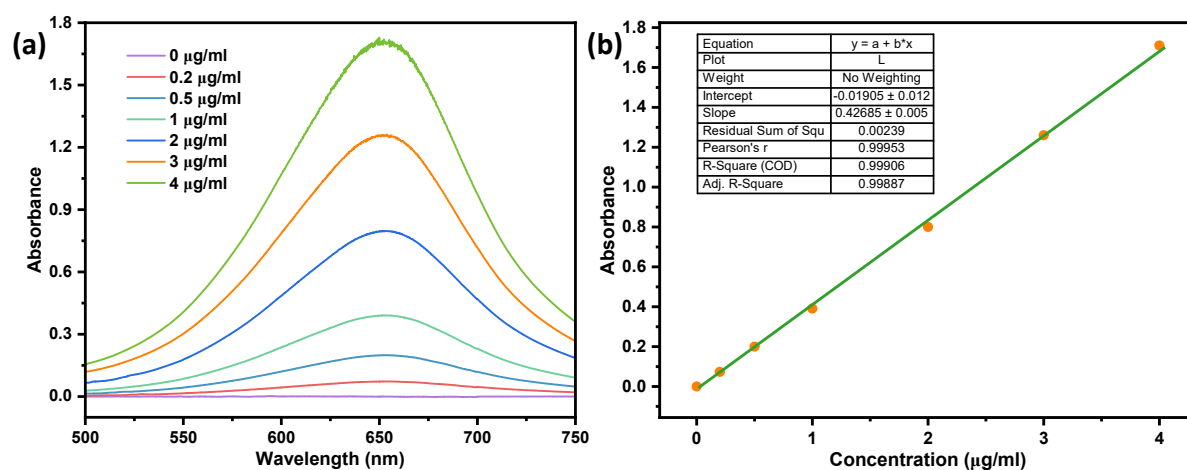

Fig. S8 (a) UV-Vis absorption spectra of  $\text{NH}_4\text{Cl}$  assays after incubation for 1h at ambient conditions and its Calibration curve used for the calculation of  $\text{NH}_3$  concentrations (b).

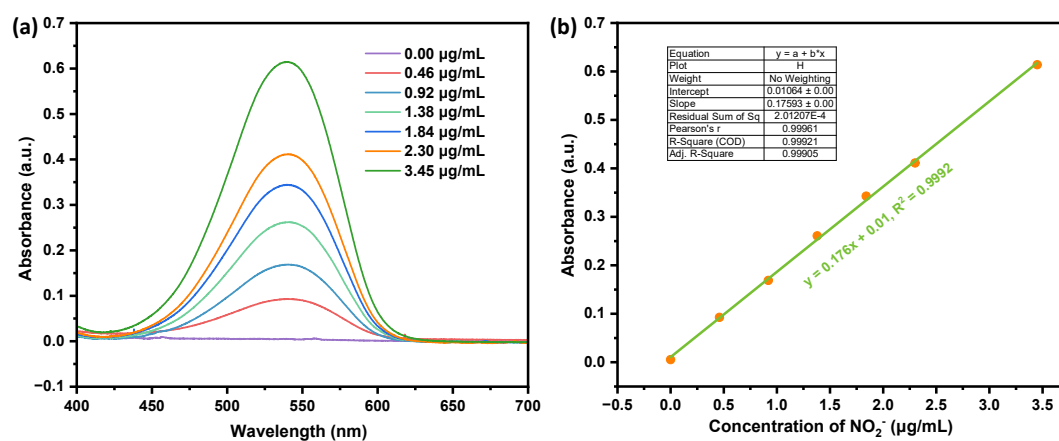

Fig. S9 UV–Vis absorption spectra of nitrite (a) and the corresponding calibration curve for quantifying nitrite concentration (b).



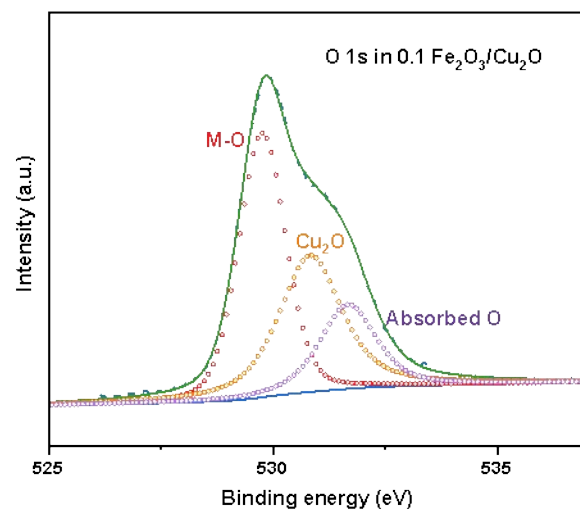

Fig. S10 XPS spectra of O 1s in 0.1 Fe<sub>2</sub>O<sub>3</sub>/Cu<sub>2</sub>O.

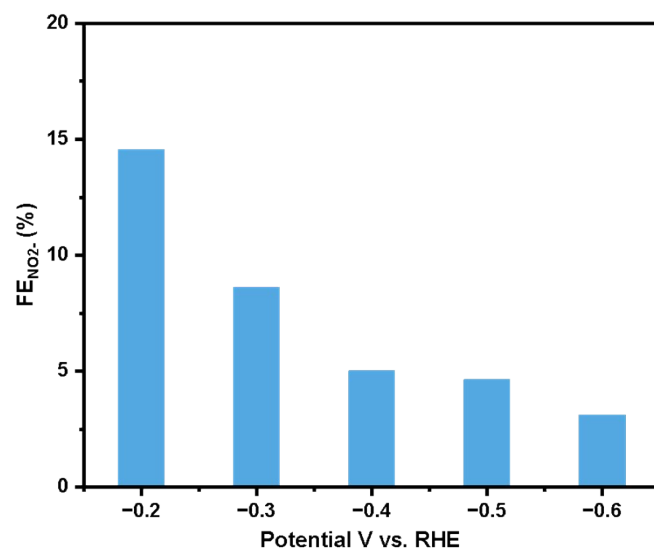

Fig. S11 The NO<sub>2</sub><sup>-</sup> FE of 0.1Fe<sub>2</sub>O<sub>3</sub>/Cu<sub>2</sub>O under various potentials.

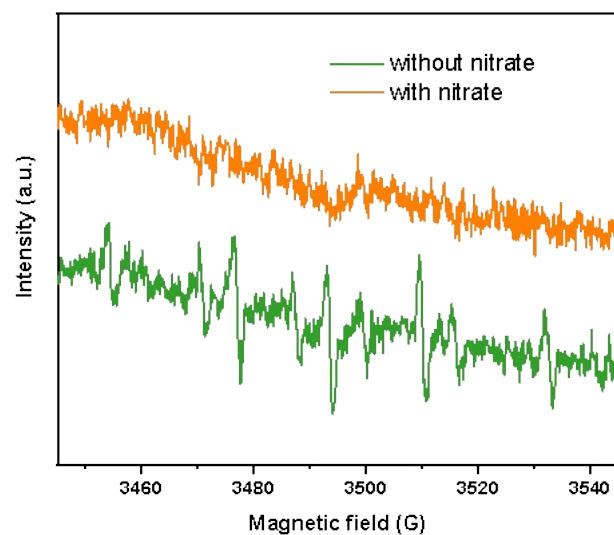

Fig. S12 EPR spectra of 0.1  $\text{Fe}_2\text{O}_3/\text{Cu}_2\text{O}$  reacted in the electrolytes with and without nitrate.

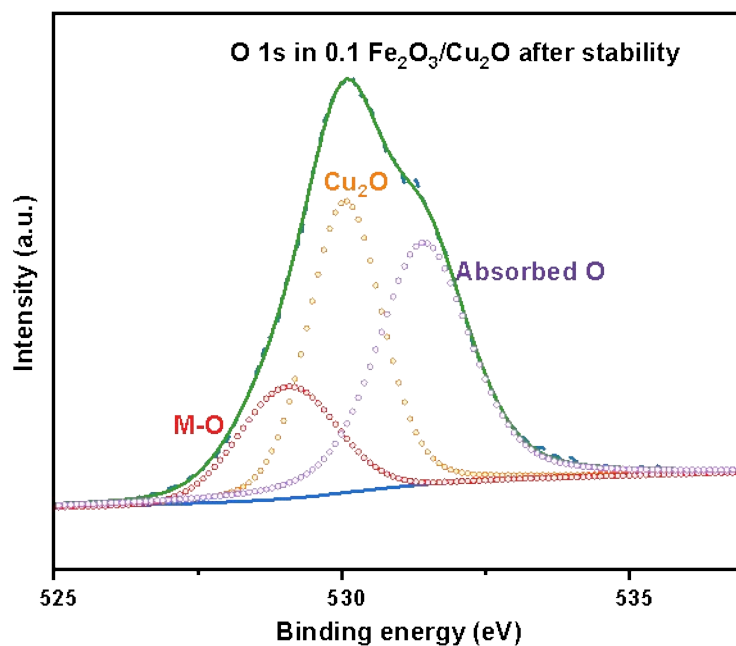

Fig. S13 XPS spectra of O 1s in 0.1 Fe<sub>2</sub>O<sub>3</sub>/Cu<sub>2</sub>O after stability test. Compared with Fig. S10, a moderate variation in the relative intensities of the M-O and adsorbed oxygen components is observed, which may reflect slight surface reorganization or increased hydroxylation during prolonged operation, while the overall lattice oxygen framework remains largely preserved.

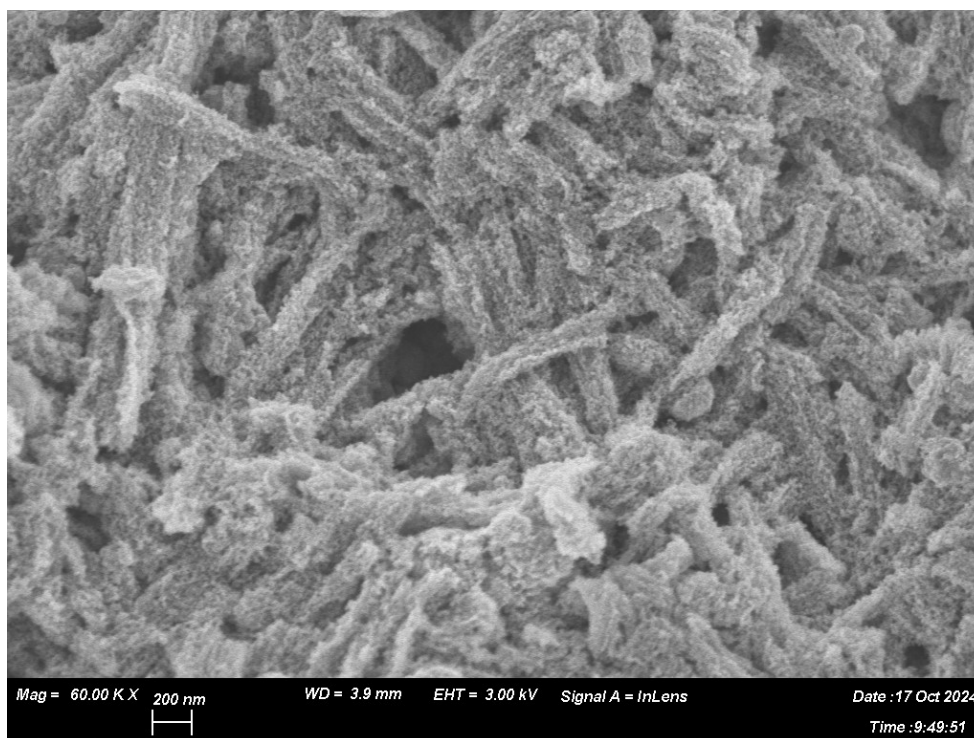

Fig. S14 SEM image of 0.1 Fe<sub>2</sub>O<sub>3</sub>/Cu<sub>2</sub>O after stability test.

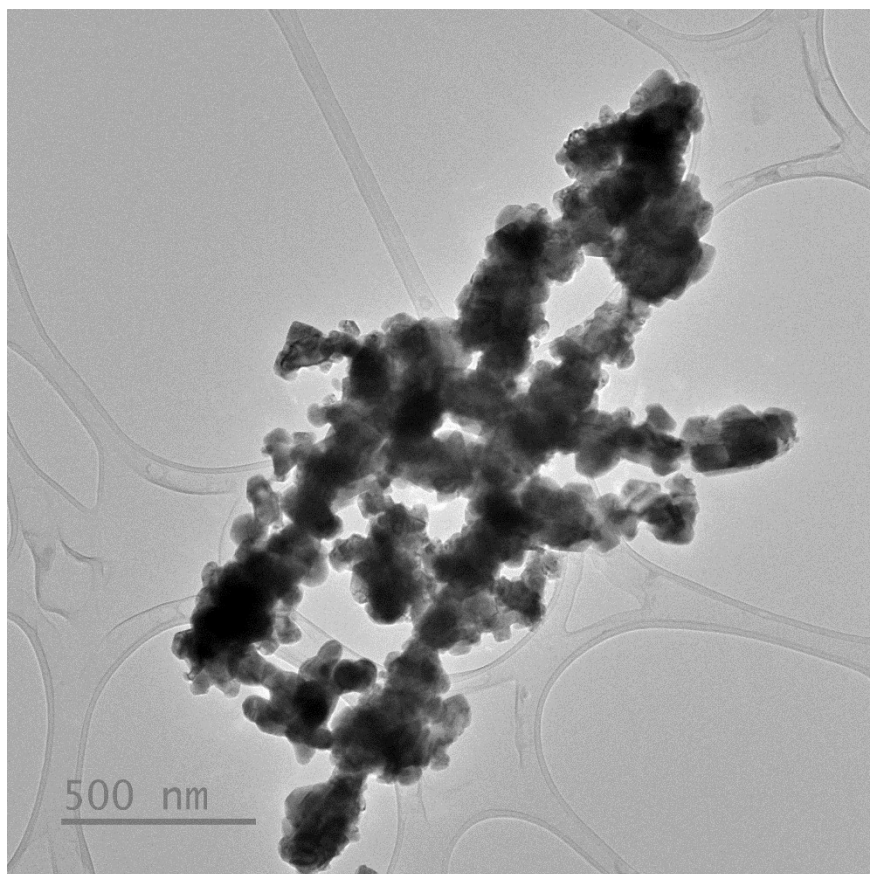

Fig. S15 TEM image of 0.1  $\text{Fe}_2\text{O}_3/\text{Cu}_2\text{O}$  after stability test.

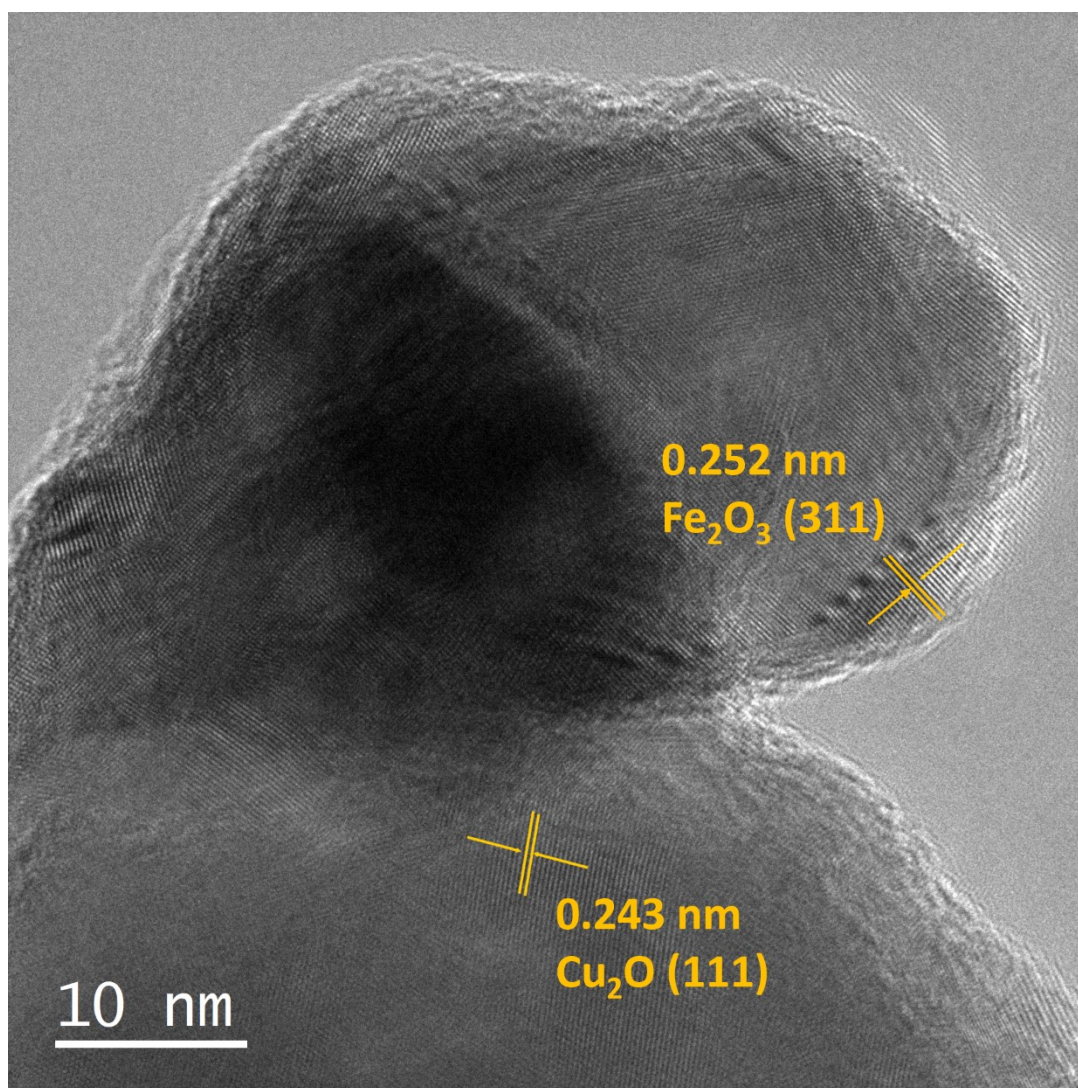

Fig. S16 HRTEM result of 0.1 Fe<sub>2</sub>O<sub>3</sub>/Cu<sub>2</sub>O after stability test.

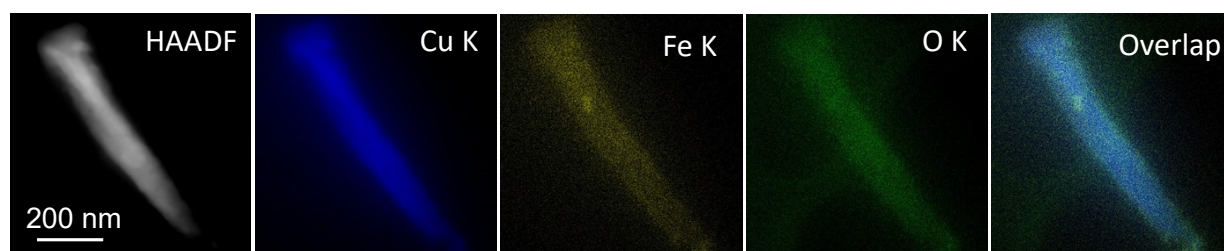

Fig. S17 TEM mapping images of 0.1  $\text{Fe}_2\text{O}_3/\text{Cu}_2\text{O}$  after stability test.



Table S2. The NH<sub>3</sub> performance comparison among various iron-based catalysts.

| Catalyst                                             | NH <sub>3</sub> yield                                        | Faradaic efficiency | Potential (vs RHE) | Electrolyte                                                                 | Stability cycles | Reference     |
|------------------------------------------------------|--------------------------------------------------------------|---------------------|--------------------|-----------------------------------------------------------------------------|------------------|---------------|
| Fe-Co <sub>3</sub> O <sub>4</sub> Nanoarray/Ti Mesh  | 0.624 mg mg cat <sup>-1</sup> h <sup>-1</sup>                | 95.5                | - 0.7              | 0.1 M PBS + 50 mM NO <sub>3</sub> <sup>-</sup>                              | 5 cycles, 9 h    | <sup>9</sup>  |
| Fe/Ni <sub>2</sub> P                                 | 4.17 mg h <sup>-1</sup> cm <sup>-2</sup>                     | 94.3                | - 0.4              | 0.2 M K <sub>2</sub> SO <sub>4</sub> + 50 mM KNO <sub>3</sub>               | 6 cycles, 11 h   | <sup>10</sup> |
| Fe <sub>2</sub> TiO <sub>5</sub>                     | 0.73 mmol mg cat <sup>-1</sup> h <sup>-1</sup>               | 87.6                | - 1.0              | PBS + 0.1 M NaNO <sub>3</sub>                                               | 12 cycles, 24 h  | <sup>11</sup> |
| LaxFeO <sub>3-δ</sub>                                | 1024.8 μg h <sup>-1</sup> cm <sup>-2</sup> @ - 1.0 V vs. RHE | 78.1                | - 0.8              | 0.1 M Na <sub>2</sub> SO <sub>4</sub> + 0.1 M NaNO <sub>3</sub>             | 4 cycles         | <sup>12</sup> |
| Cu/Fe-TiO <sub>2</sub>                               | NA                                                           | 91.2                | - 1.4 V vs. SCE    | 0.5 M Na <sub>2</sub> SO <sub>4</sub> + 50 ppm NO <sub>3</sub> <sup>-</sup> | 5 cycles, 16 h   | <sup>13</sup> |
| Fe <sub>3</sub> O <sub>4</sub> @TiO <sub>2</sub> /TP | 12394.3 μg h <sup>-1</sup> cm <sup>-2</sup>                  | 88.4                | - 0.9              | 0.1 M PBS + 0.1 M NaNO <sub>3</sub>                                         | 12 cycles, 12 h  | <sup>14</sup> |

## References

1. L. Li, C. Tang, B. Xia, H. Jin, Y. Zheng and S.-Z. Qiao, *ACS Catalysis*, 2019, **9**, 2902-2908.
2. J. Wang, D. Wu, M. Li, X. Wei, X. Yang, M. Shao and M. Gu, *Nano Letters*, 2022, **22**, 5600-5606.
3. G. Kresse and J. Furthmüller, *Computational materials science*, 1996, **6**, 15-50.
4. G. Kresse and J. Furthmüller, *Physical review B*, 1996, **54**, 11169.
5. P. E. Blöchl, *Physical review B*, 1994, **50**, 17953.
6. J. P. Perdew, K. Burke and M. Ernzerhof, *Physical review letters*, 1996, **77**, 3865.
7. S. Grimme, J. Antony, S. Ehrlich and H. Krieg, *The Journal of chemical physics*, 2010, **132**, 154104.
8. V. Wang, N. Xu, J.-C. Liu, G. Tang and W.-T. Geng, *Computer Physics Communications*, 2021, **267**, 108033.
9. P. Wei, J. Liang, Q. Liu, L. Xie, X. Tong, Y. Ren, T. Li, Y. Luo, N. Li, B. Tang, A. M. Asiri, M. S. Hamdy, Q. Kong, Z. Wang and X. Sun, *Journal of Colloid and Interface Science*, 2022, **615**, 636-642.
10. R. Zhang, Y. Guo, S. Zhang, D. Chen, Y. Zhao, Z. Huang, L. Ma, P. Li, Q. Yang, G. Liang and C. Zhi, *Advanced Energy Materials*, 2022, **12**, 2103872.
11. H. Du, H. Guo, K. Wang, X. Du, B. A. Beshiwork, S. Sun, Y. Luo, Q. Liu, T. Li and X. Sun, *Angewandte Chemie International Edition*, 2023, **62**, e202215782.
12. Q. Yin, S. Hu, J. Liu and H. Zhou, *Sustainable Energy & Fuels*, 2022, **6**, 4716-4725.
13. X. Yang, R. Wang, S. Wang, C. Song, S. Lu, L. Fang, F. Yin and H. Liu, *Applied Catalysis B: Environmental*, 2023, **325**, 122360.
14. X. He, J. Li, R. Li, D. Zhao, L. Zhang, X. Ji, X. Fan, J. Chen, Y. Wang, Y. Luo, D. Zheng, L. Xie, S. Sun, Z. Cai, Q. Liu, K. Ma and X. Sun, *Inorganic Chemistry*, 2023, **62**, 25-29.
